# Supplementary material
Source: publisher site journal article supplement (https://www.dovepress.com/article/330713)
Supplement: Supplementary file 1 [file get_supplementary_file.php]

**Supplementary Table S1.** The sequences of shRNAs cloned into plasmids.

| ShRNAs | Sequence (5’-3’) |
| --- | --- |
| sh-HNRNPC1 | GCCTTCGTTCAGTATGTTAATCTCGAGATTAACATACTGAACGAAGGCTTTTT |
| sh-HNRNPC2 | CTGGATGATGATGATAATGAACTCGAGTTCATTATCATCATCATCCAGTTTTT |
| sh-NC | TTCTCCGAACGTGTCACGTCTCGAGACGTGACACGTTCGGAGAATTTTT |

**Supplementary Table S2.** The sequences of primers for qRT-PCR

| Primers | Forward (5’-3’) | Reverse (5’-3’) |
| --- | --- | --- |
| HNRNPC | GCCAGCAACGTTACCAACAA | TGAACAGAGCAGCCCACAAT |
| β-actin | CATGTACGTTGCTATCCAGGC | CTCCTTAATGTCACGCACGAT |

**Supplementary Table S3.** The antibodies used in the present study

| antibodies | Manufacturer | Cat No. | Dilution ratio |
| --- | --- | --- | --- |
| HNRNPC Polyclonal antibody | Proteintech, Rosemont, USA | 11760-1-AP | 1:2000 |
| β-actin Monoclonal antibody | Proteintech, Rosemont, USA | 66009-1-Ig | 1:5000 |

**Supplementary Table S4.** Logistic regression of HNRNPF expression and clinicopathological characteristics in PCa

| Characteristics | Total(N) | Odds Ratio (OR) | P value |
| --- | --- | --- | --- |
| Age (>60 vs. <=60) | 499 | 0.975 (0.685-1.388) | 0.889 |
| T stage (T3&T4 vs. T2) | 492 | 1.756 (1.218-2.541) | **0.003** |
| N stage (N1 vs. N0) | 426 | 1.795 (1.092-2.998) | **0.023** |
| M stage (M1 vs. M0) | 458 | 1.957 (0.186-42.276) | 0.585 |
| PSA (ng/ml) (>=4 vs. <4) | 442 | 1.827 (0.831-4.230) | 0.142 |
| Gleason score (8&9&10 vs. 6&7) | 499 | 2.466 (1.714-3.568) | **<0.001** |

Bold text indicates statistically significant p-values.

**Supplementary Table S5.** The correlation between HNRNPC mRNA expression and various immune cells

| Immune cells | Correlation | |Correlation| | *p* value |
| --- | --- | --- | --- |
| NK cells | -0.3469 | 0.3469 | 6.14764E-09 |
| Tem | -0.3463 | 0.3463 | 6.57137E-09 |
| pDC | -0.2848 | 0.2848 | 2.34191E-06 |
| NK CD56bright cells | -0.2729 | 0.2729 | 6.32391E-06 |
| DC | -0.249 | 0.249 | 4.01419E-05 |
| iDC | -0.2234 | 0.2234 | 0.000239164 |
| Neutrophils | -0.2205 | 0.2205 | 0.000289405 |
| Th17 cells | -0.2065 | 0.2065 | 0.000701111 |
| Th1 cells | -0.2036 | 0.2036 | 0.000837154 |
| TReg | -0.2016 | 0.2016 | 0.000941996 |
| Eosinophils | -0.1945 | 0.1945 | 0.001433216 |
| TFH | -0.1897 | 0.1897 | 0.001881226 |
| NK CD56dim cells | -0.1233 | 0.1233 | 0.044461486 |
| Tgd | -0.1153 | 0.1153 | 0.060405625 |
| Macrophages | -0.1134 | 0.1134 | 0.064834023 |
| Cytotoxic cells | -0.08924 | 0.08924 | 0.146636066 |
| B cells | -0.0712 | 0.0712 | 0.247157401 |
| Mast cells | -0.06358 | 0.06358 | 0.301511203 |
| T cells | -0.06356 | 0.06356 | 0.301661802 |
| Tcm | 0.08959 | 0.08959 | 0.145072195 |
| Th2 cells | 0.2991 | 0.2991 | 6.69848E-07 |
